# Supplementary figures and images for: Genome-Wide Identification and Expression Analysis of the SQUAMOSA Promoter-Binding Protein-like (SPL) Transcription Factor Family in Catalpa bungei
Source: MDPI journal article supplement (doi:10.3390/ijms25010097), 2023-12-20

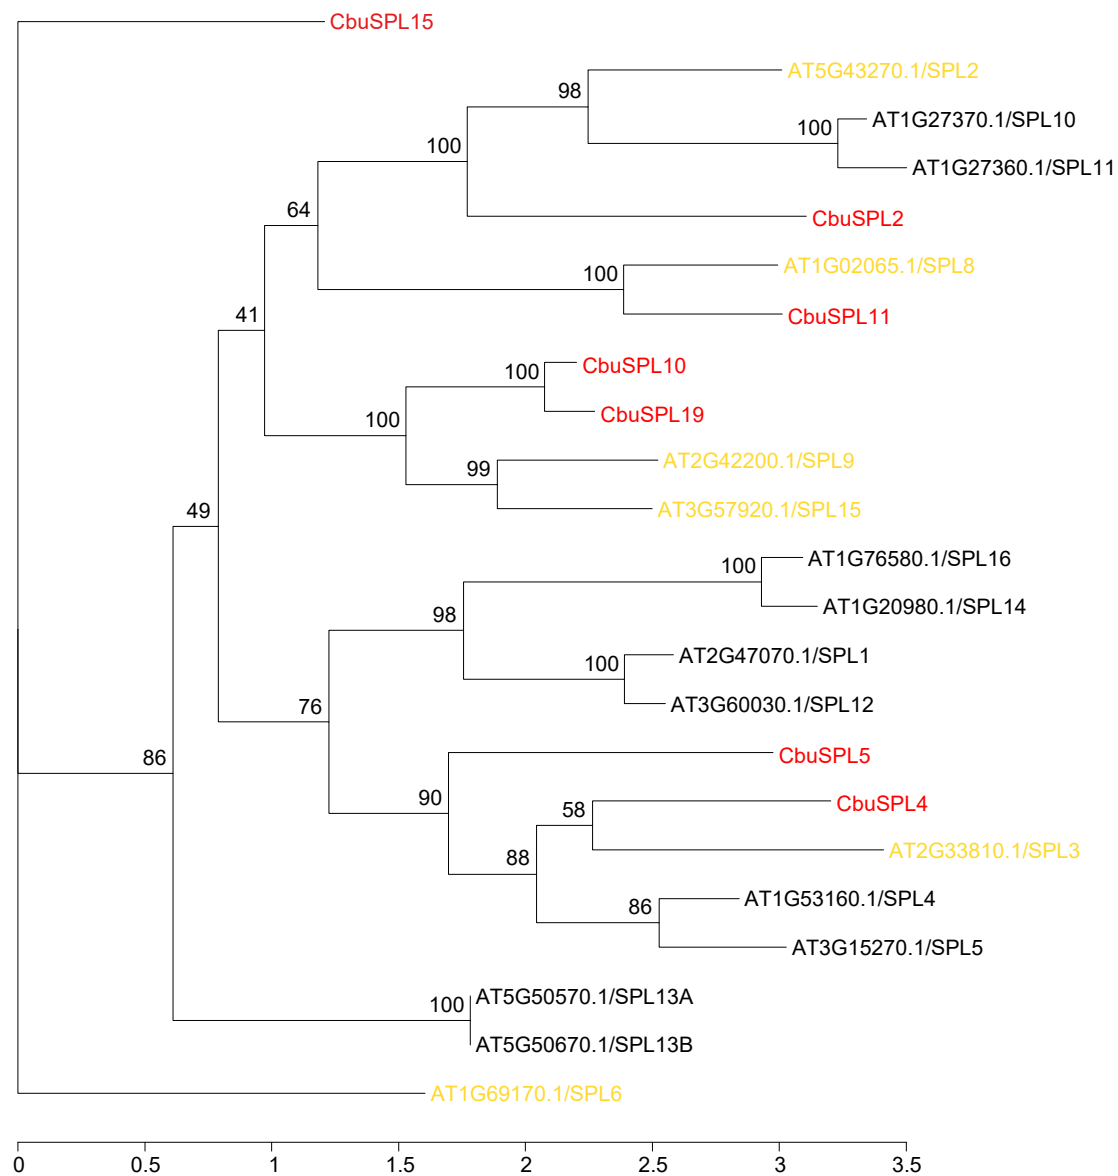

Supplementary Figure S1. The best homologous hits of *CbuSPL* genes in *Arabidopsis thaliana*.

Supplement: s1 [file s1]
